# Supplementary figures and images for: The architecture of EMC reveals a path for membrane protein insertion
Source: eLife journal article supplement (doi:10.7554/elife.57887), 2020-05-27

Fig. 5 – figure supplement 5

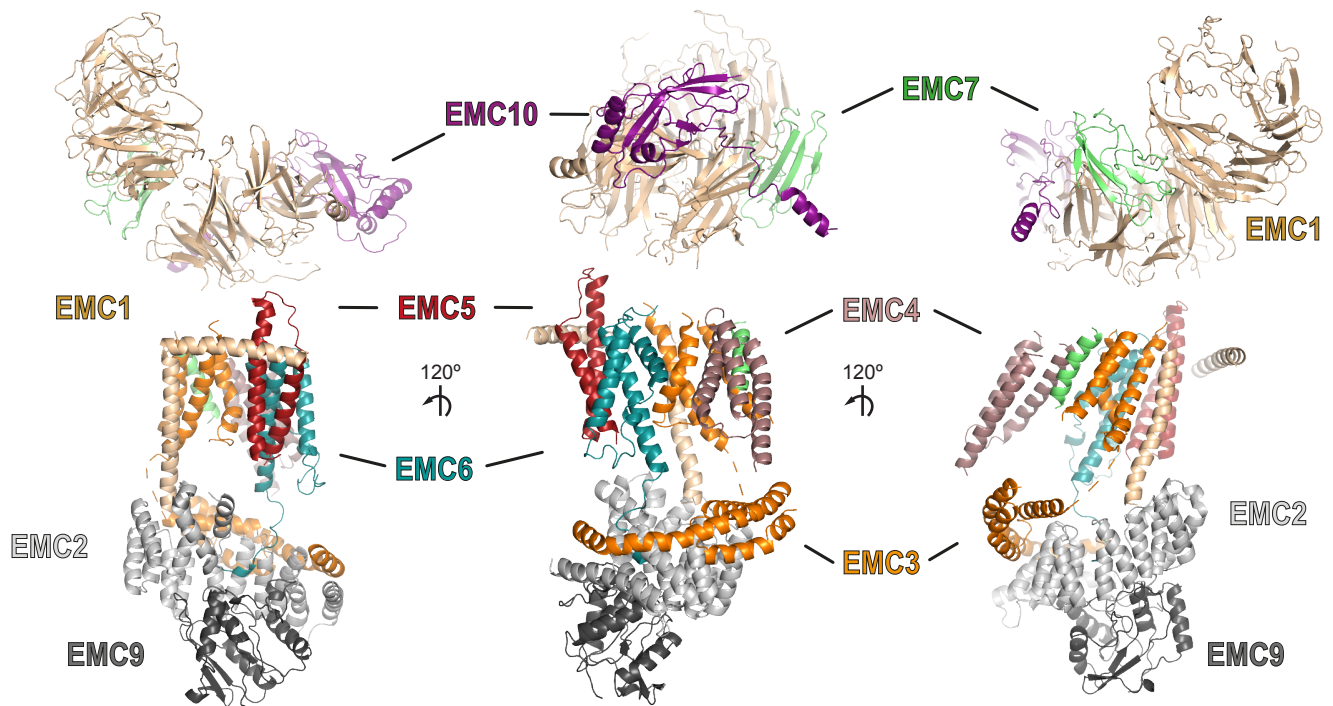

Supplement: supp [file elife-57887-supp-v1.zip]

Fig. 5 – figure supplement 1

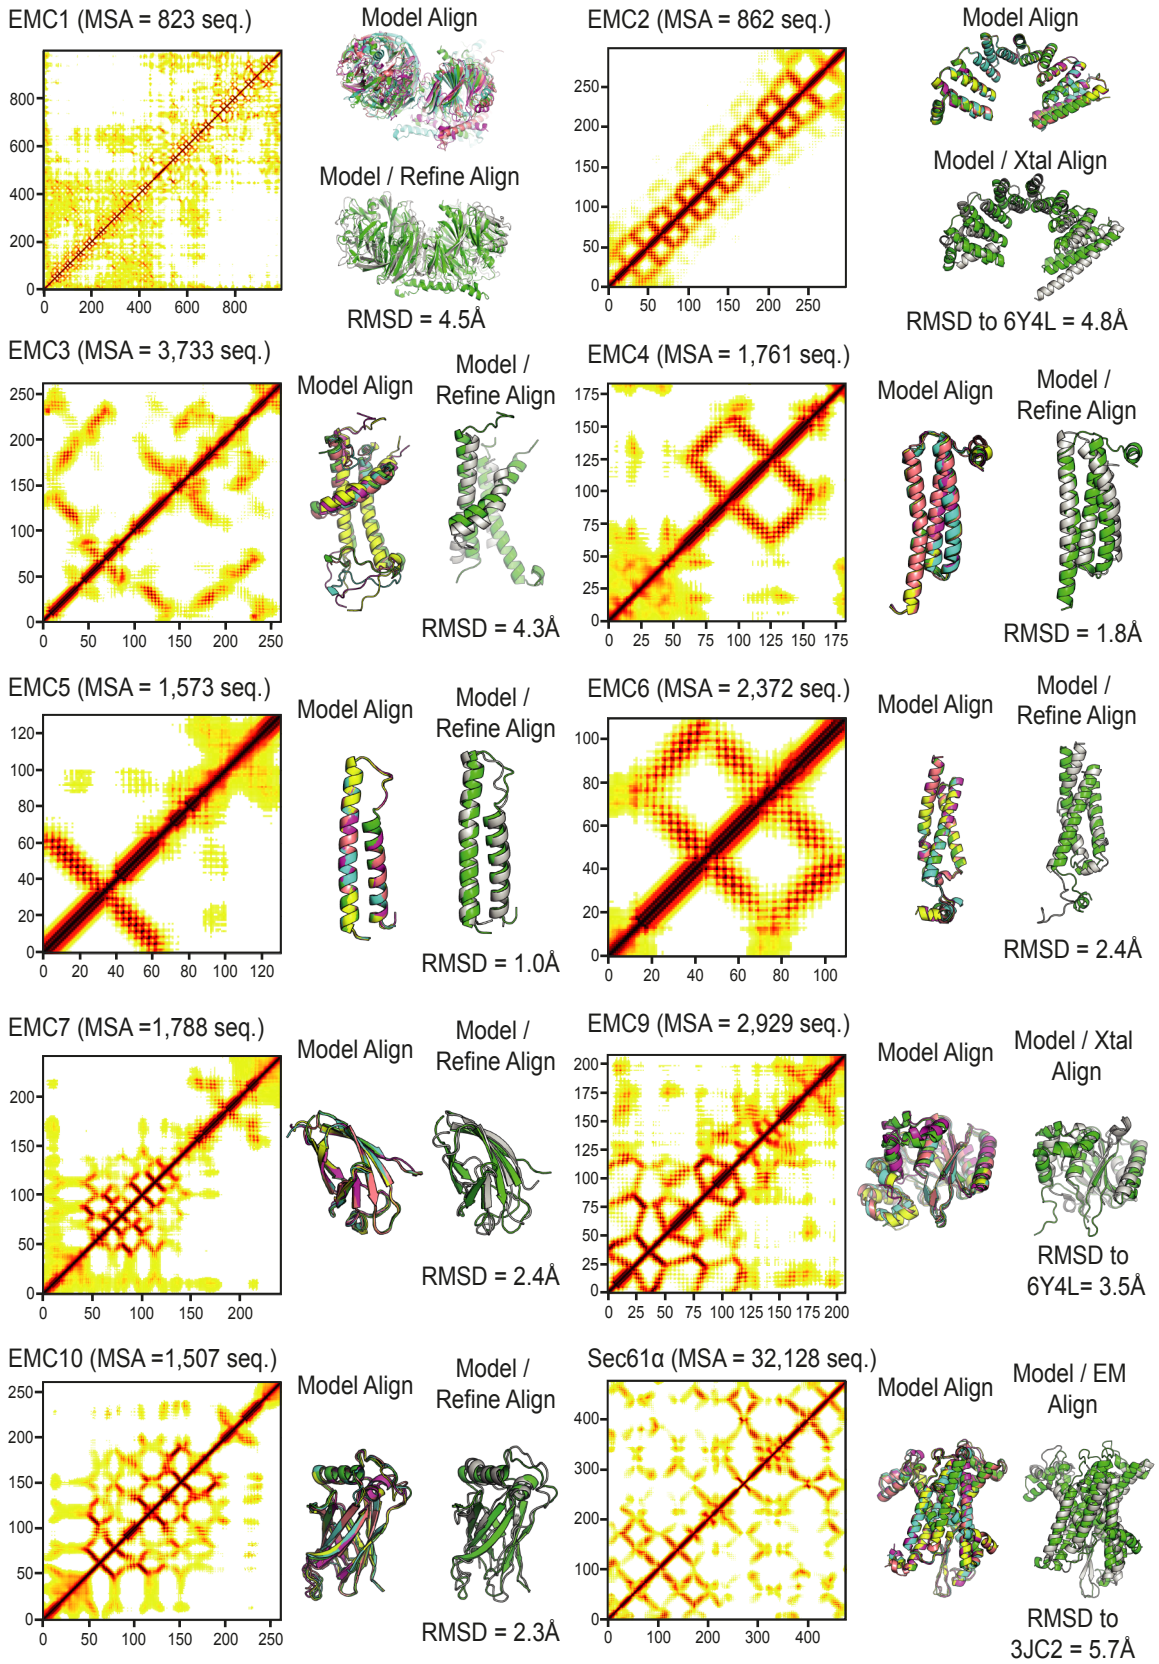

Supplement: supp [file elife-57887-supp-v1.zip]

Fig. 2 – figure supplement 1

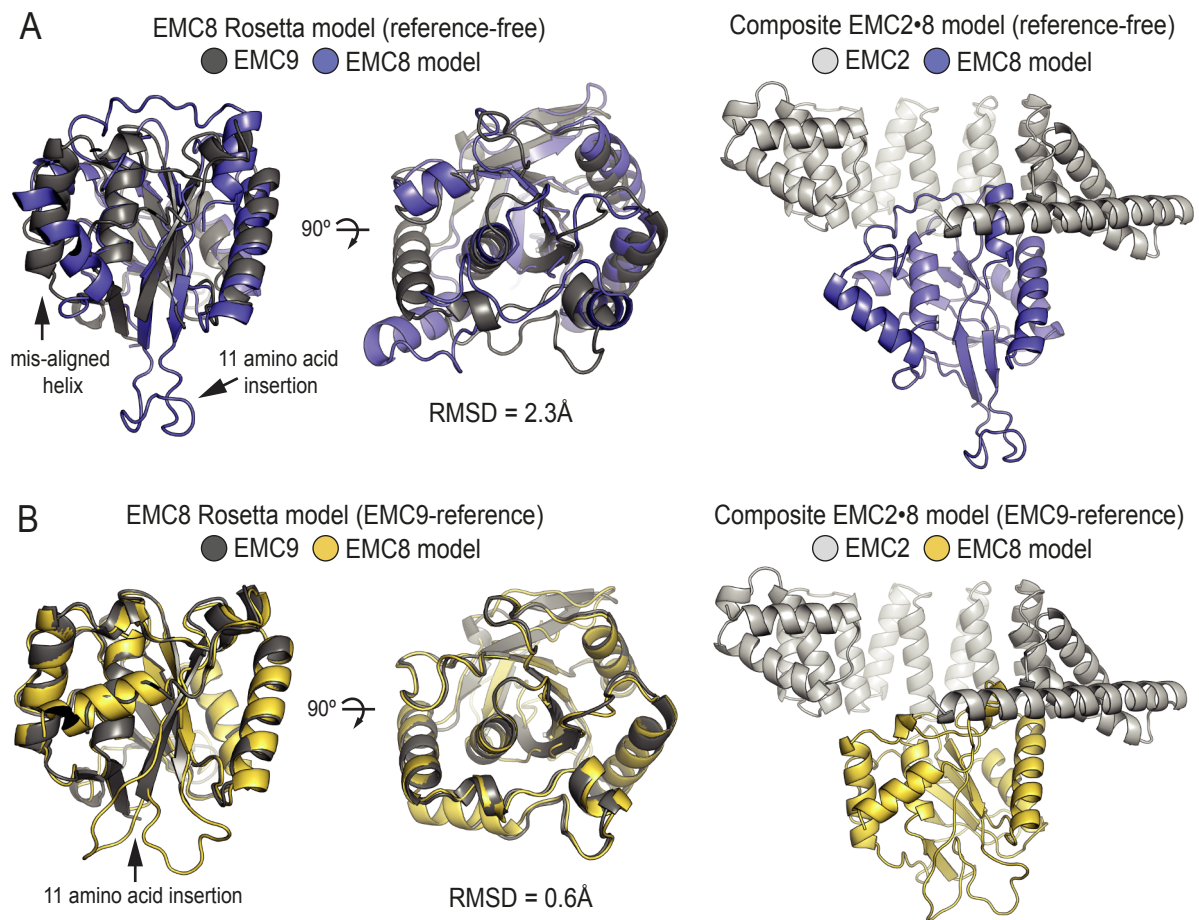

Supplement: supp [file elife-57887-supp-v1.zip]

Fig. 5 – figure supplement 4

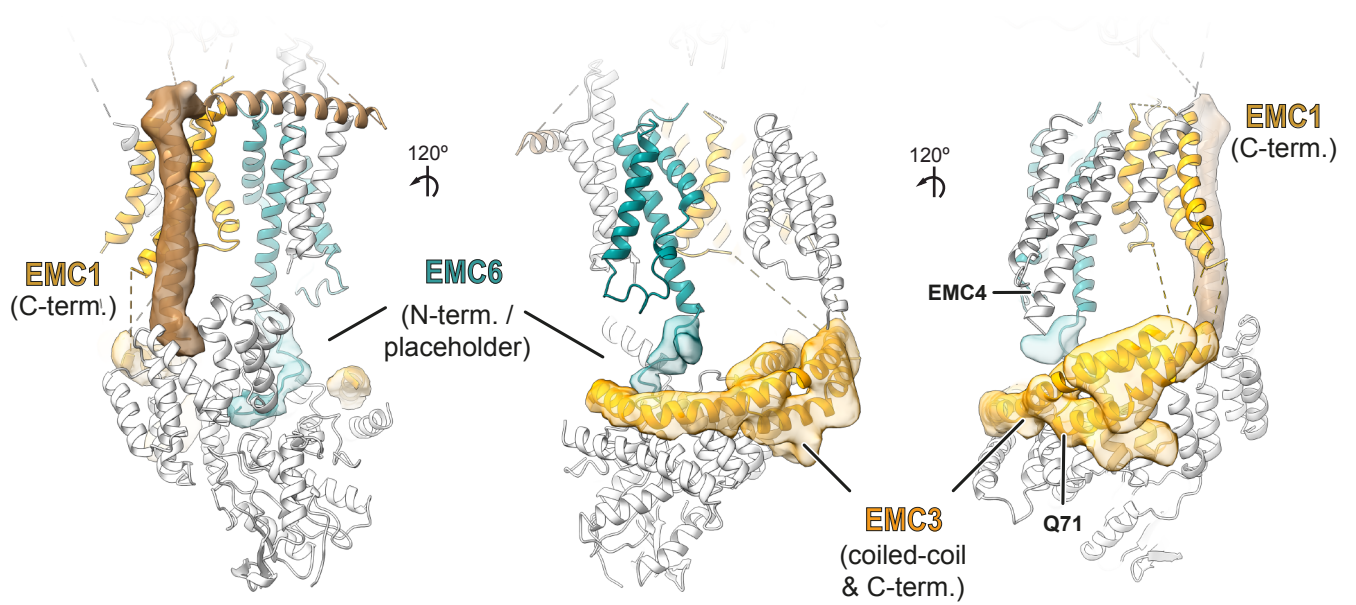

Supplement: supp [file elife-57887-supp-v1.zip]

Fig. 3 – figure supplement 2

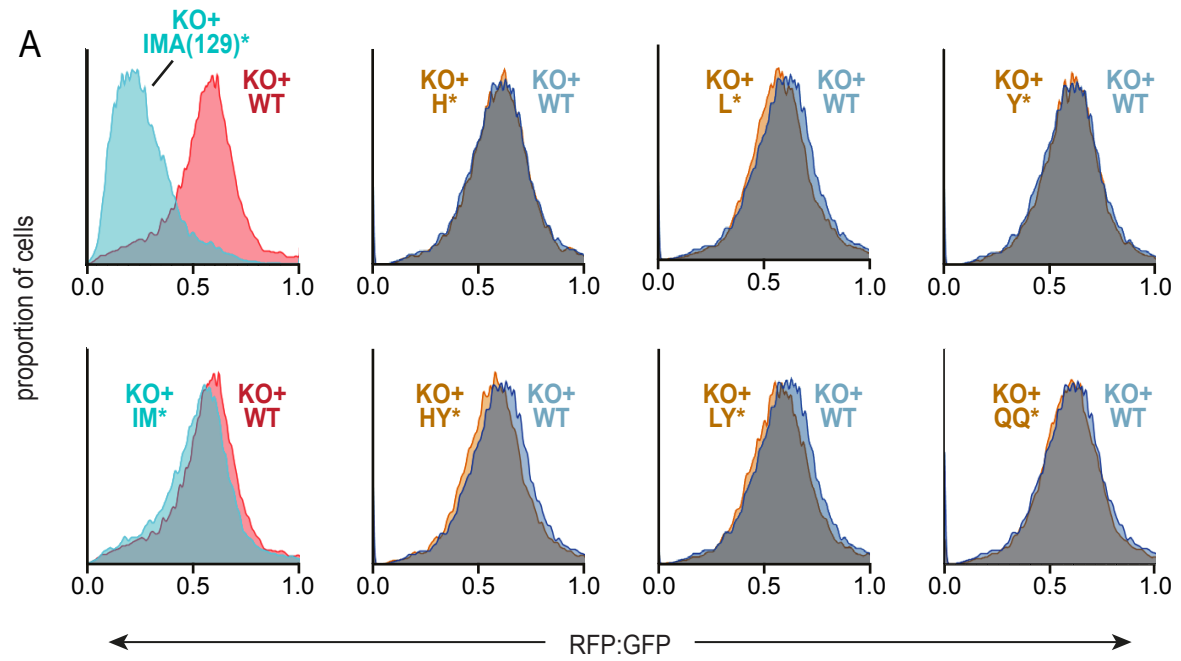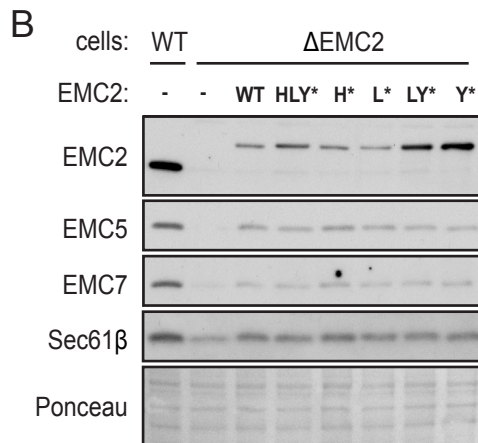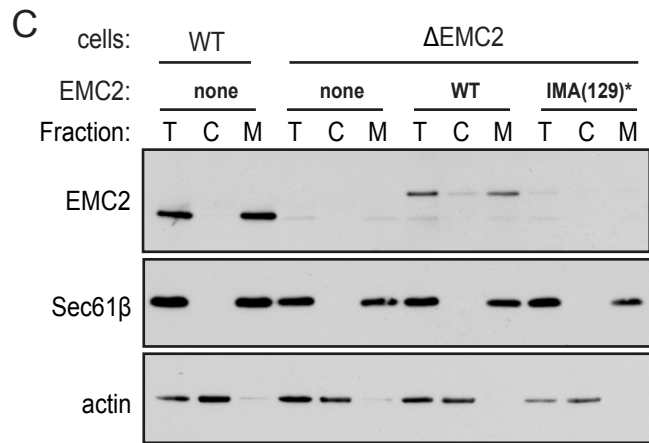

Supplement: supp [file elife-57887-supp-v1.zip]

Fig. 2 – figure supplement 2

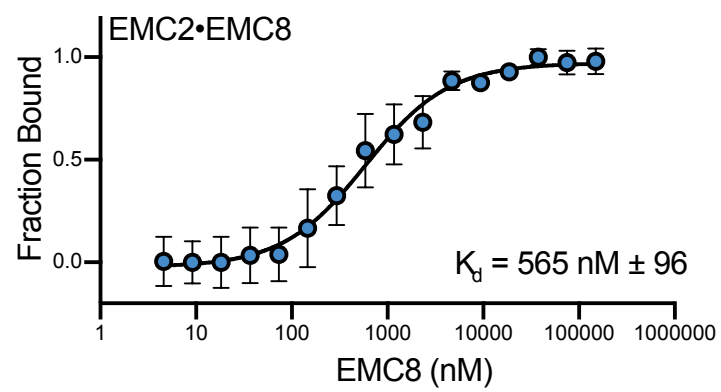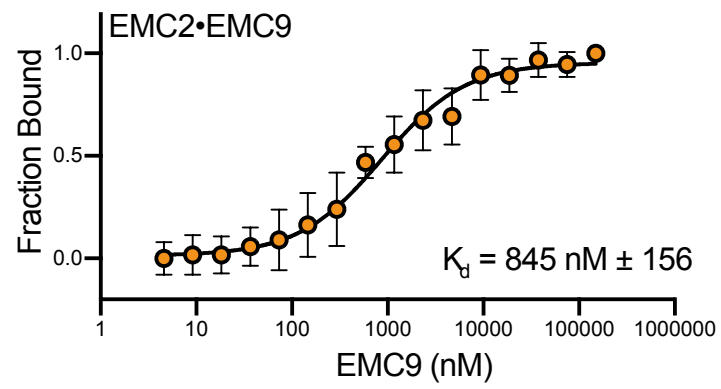

Supplement: supp [file elife-57887-supp-v1.zip]

Fig. 3 – figure supplement 1

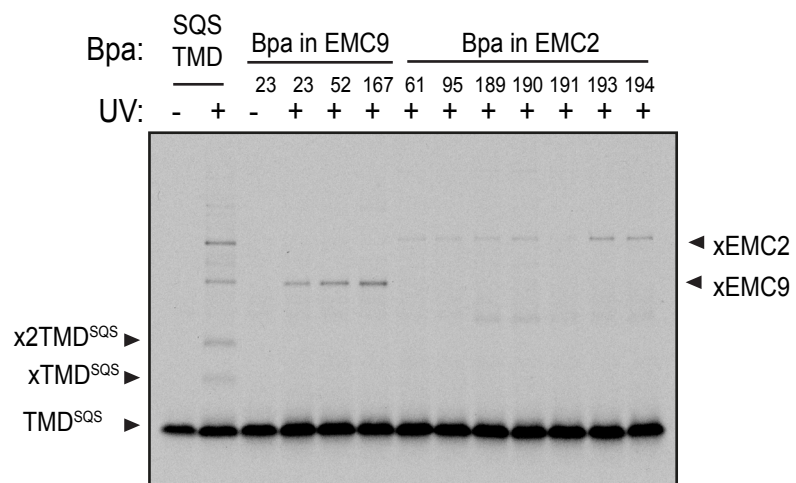

Supplement: supp [file elife-57887-supp-v1.zip]

Fig. 1 – figure supplement 1

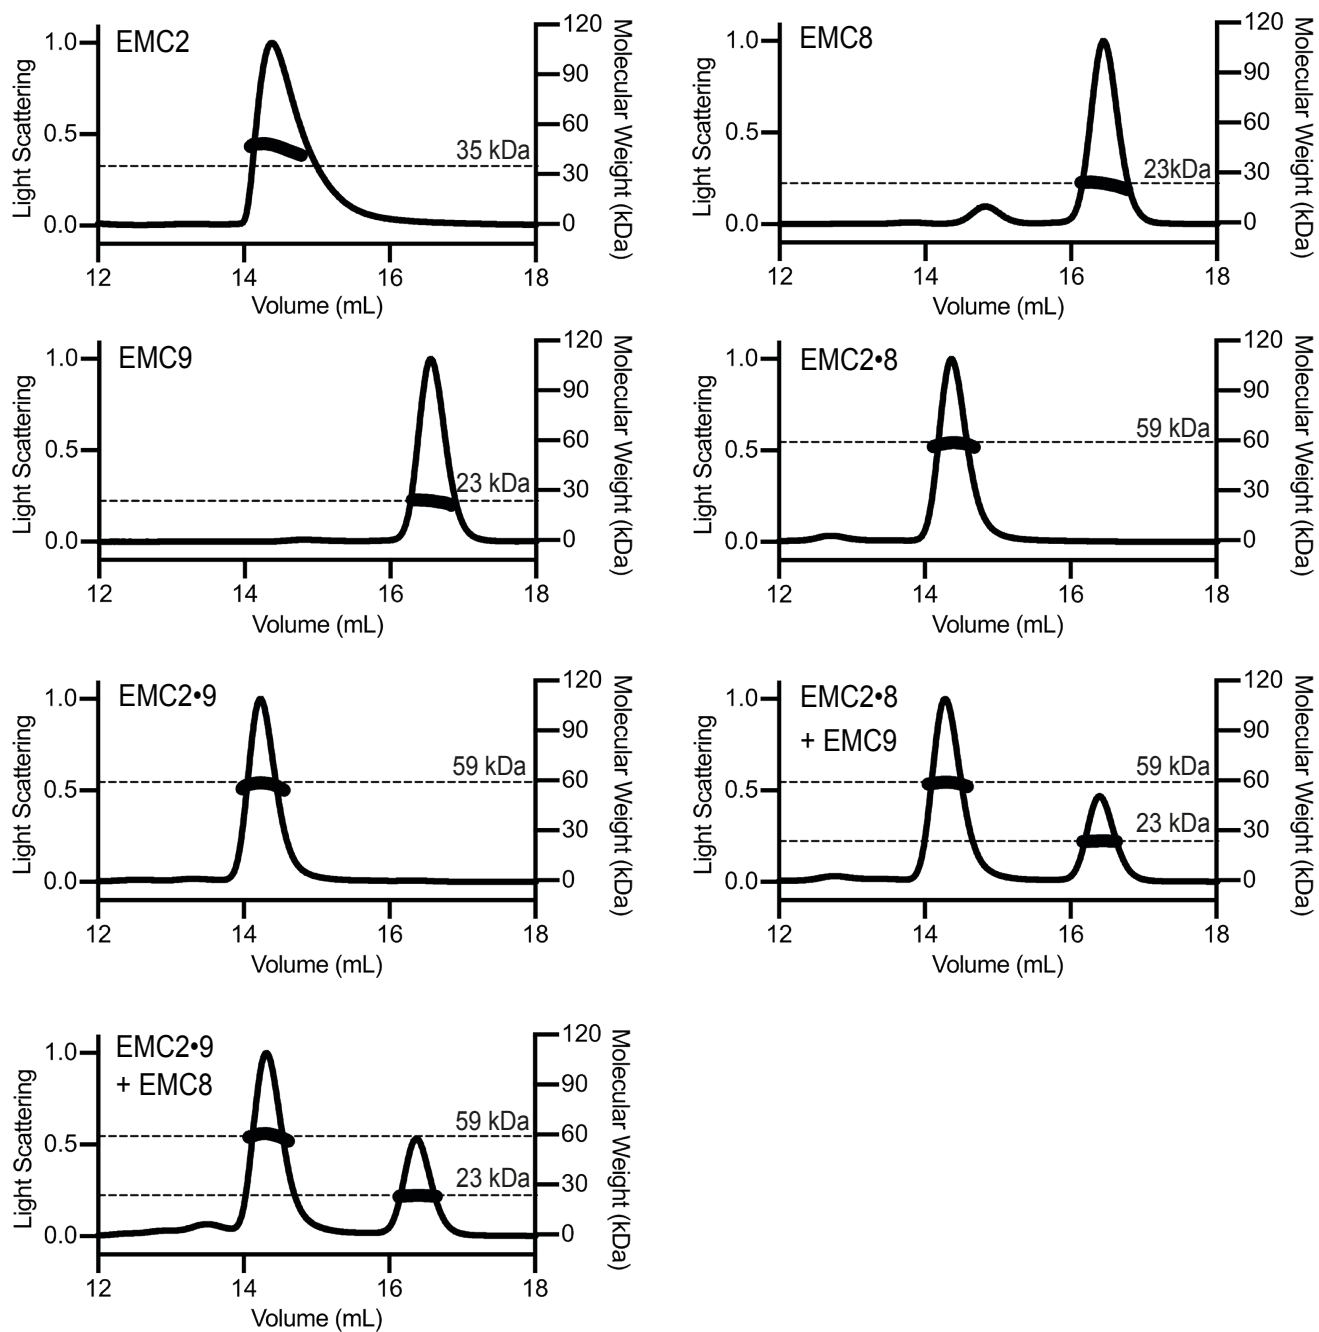

Supplement: supp [file elife-57887-supp-v1.zip]

**Fig. 5 – figure supplement 3**

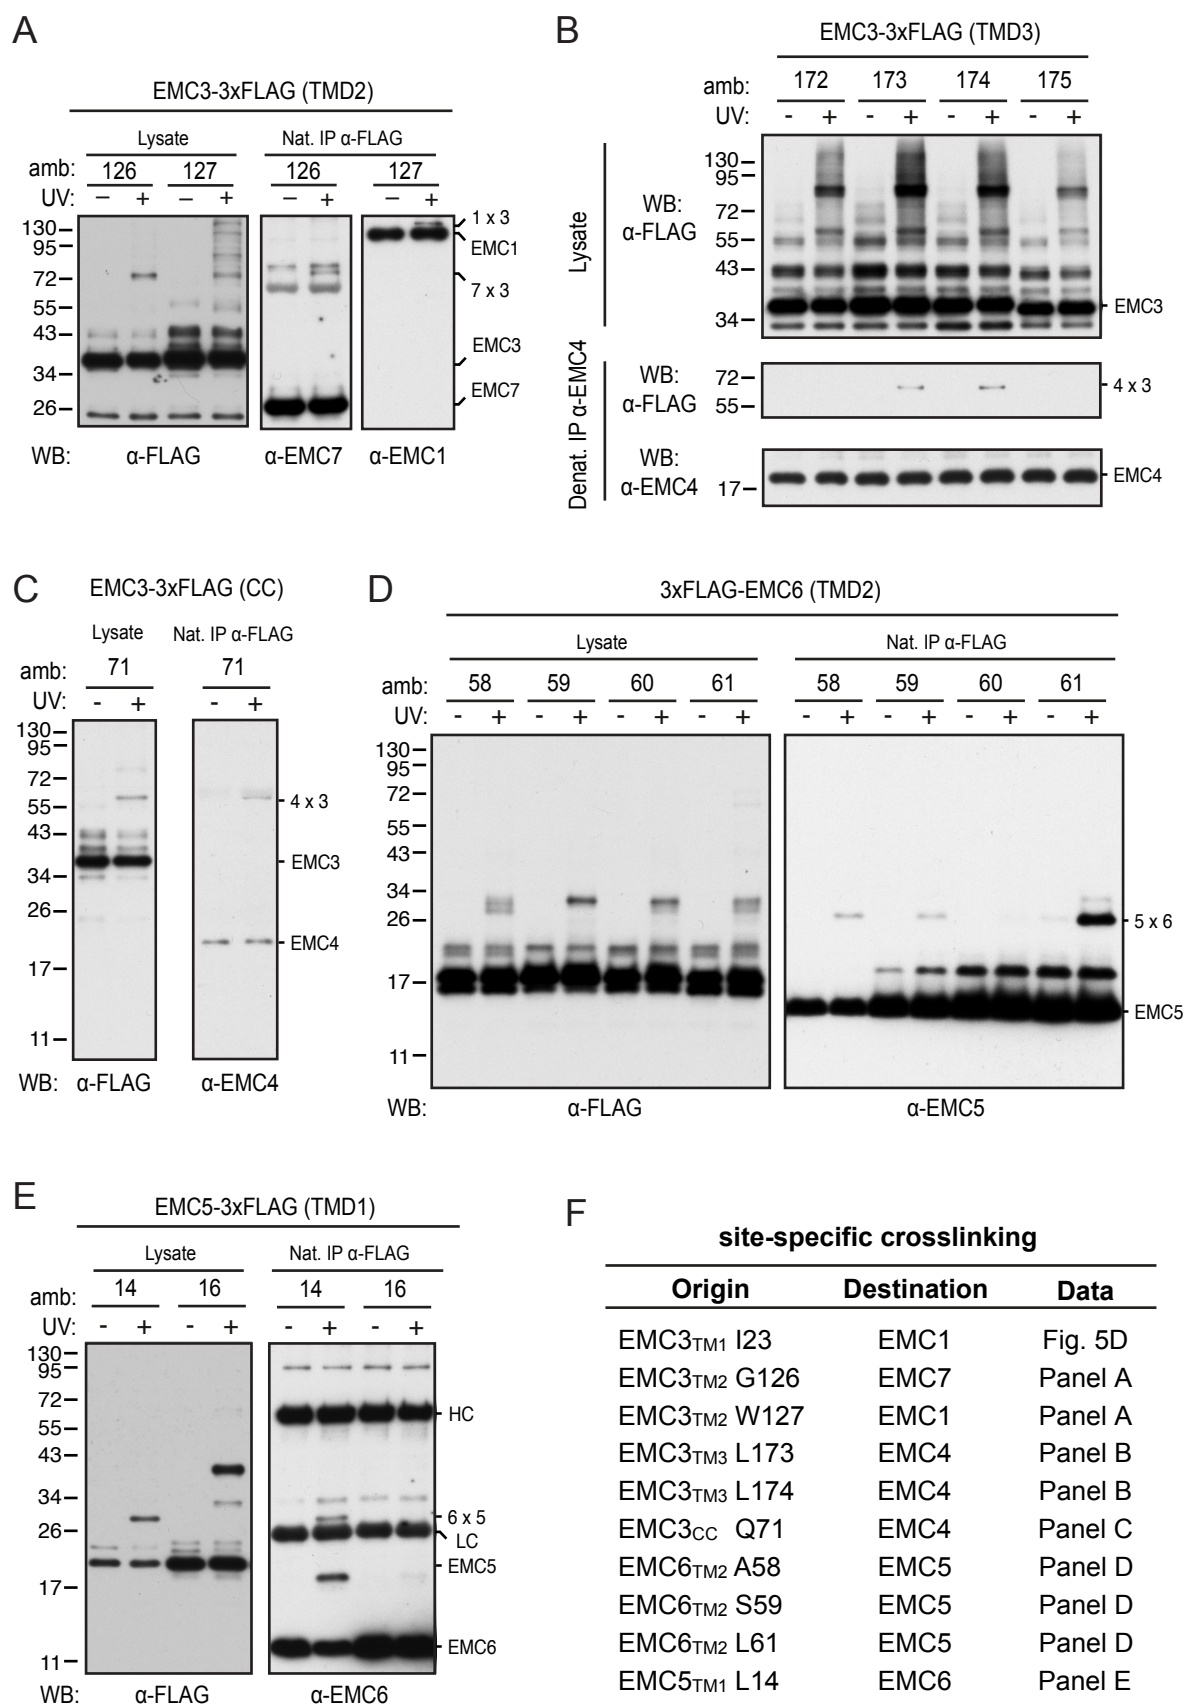

Supplement: supp [file elife-57887-supp-v1.zip]

Fig. 5 – figure supplement 2

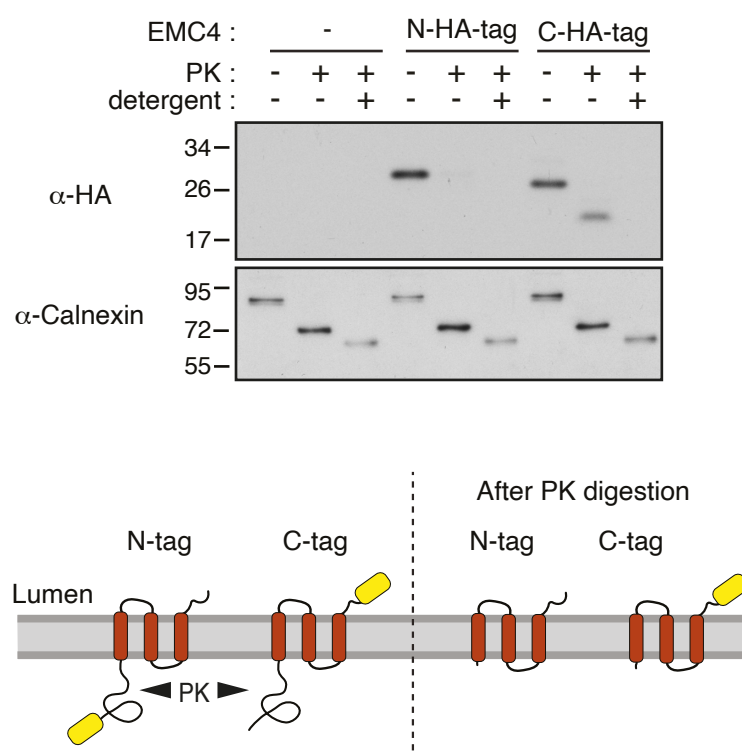

Supplement: supp [file elife-57887-supp-v1.zip]

Fig. 1 – figure supplement 3

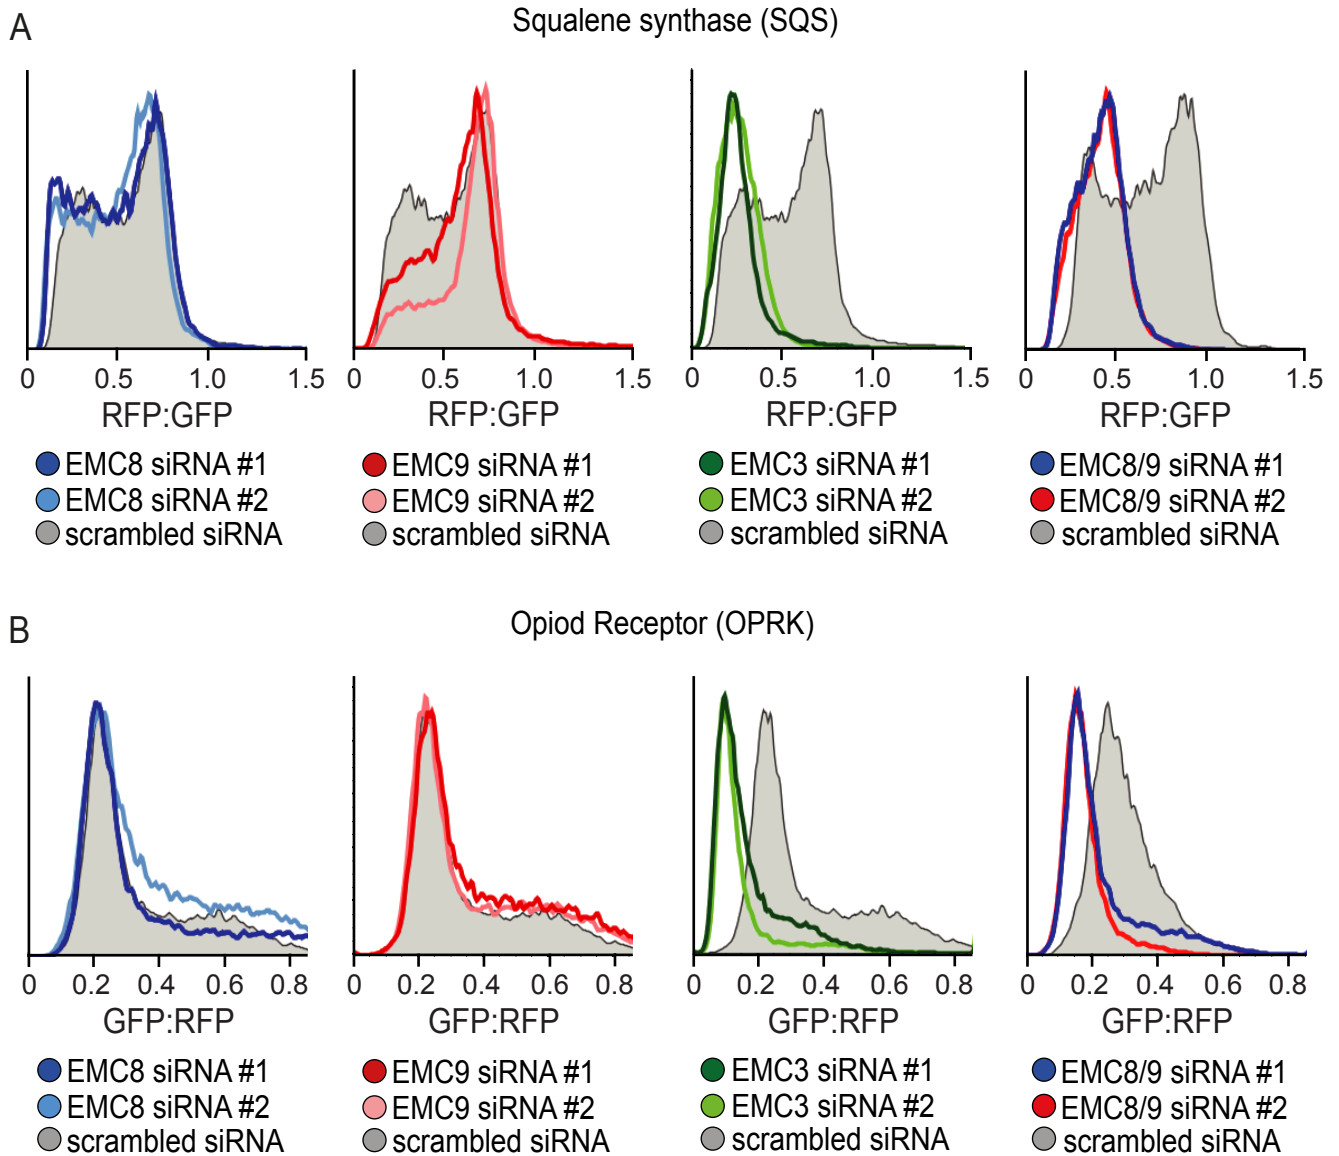

Supplement: supp [file elife-57887-supp-v1.zip]

Fig. 4 – figure supplement 2

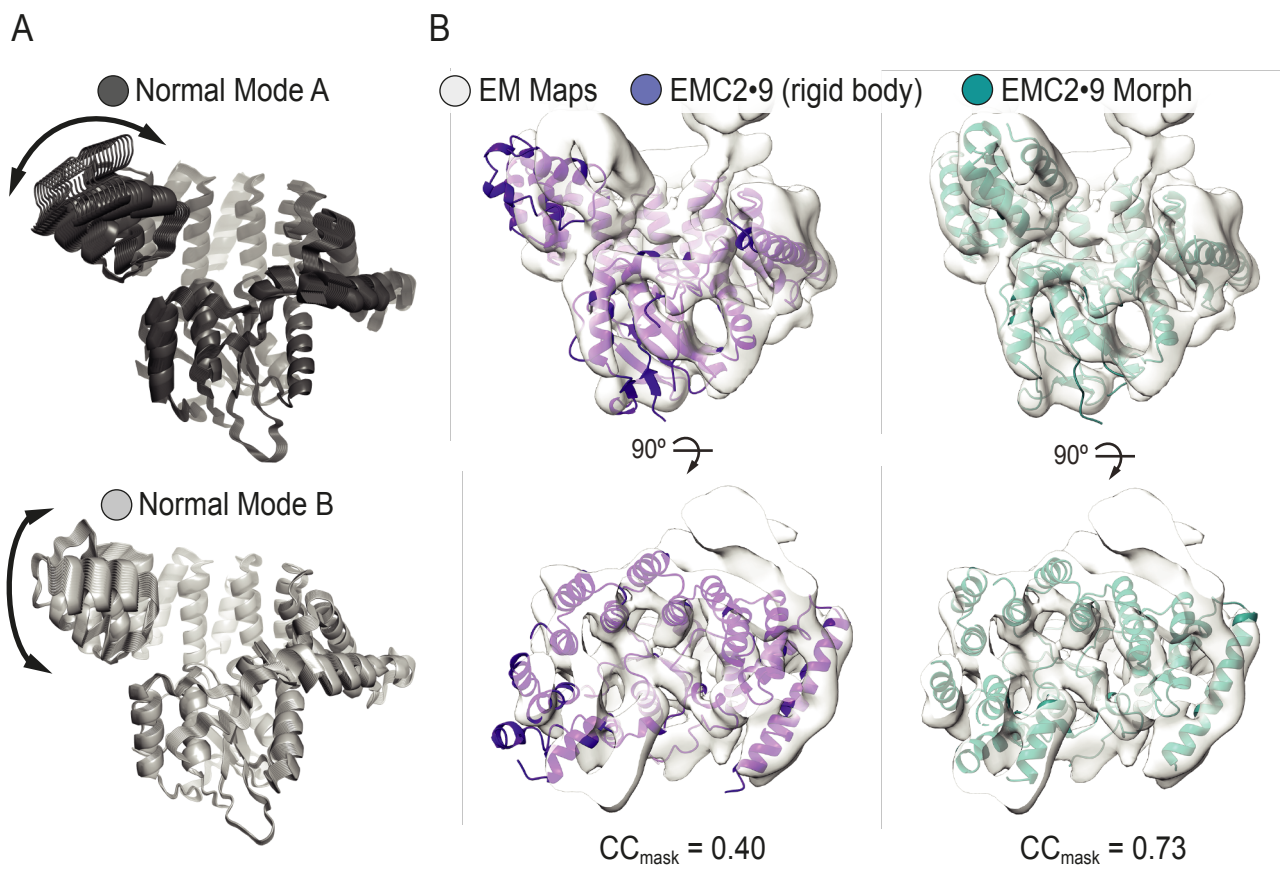

Supplement: supp [file elife-57887-supp-v1.zip]

Fig. 4 – figure supplement 1

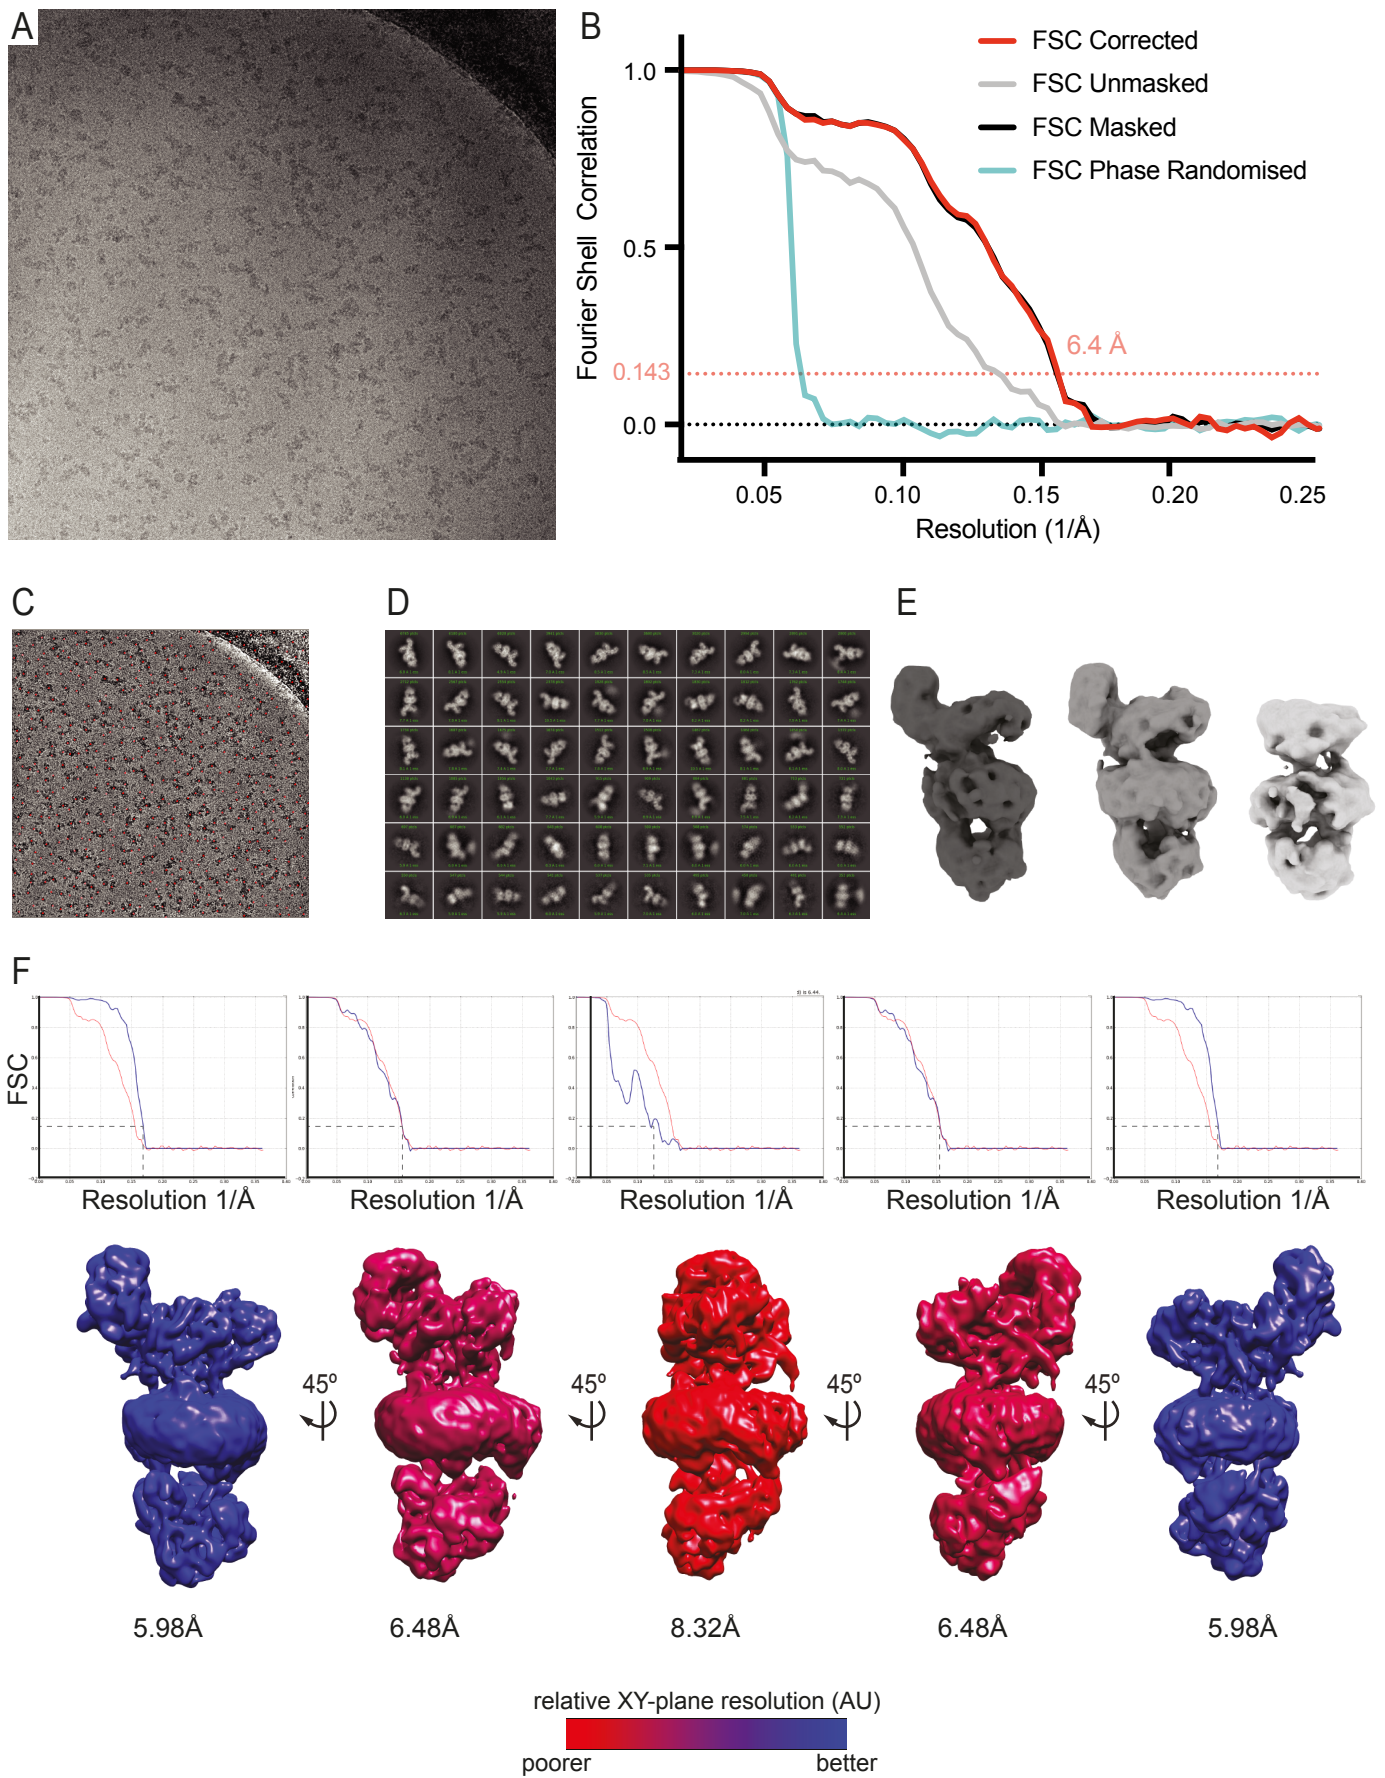

Supplement: supp [file elife-57887-supp-v1.zip]
